# Supplementary material for: Leukemia Cell Lines: In Vitro Models for the Study of Chronic Neutrophilic Leukemia
Source: MDPI journal article supplement (doi:10.3390/curroncol28030166), 2021-05-10
Supplement: s1 [file s1]

*Brief Report*

# Leukemia Cell Lines: In Vitro Models for the Study of Chronic Neutrophilic Leukemia

Hans G. Drexler, Stefan Nagel and Hilmar Quentmeier

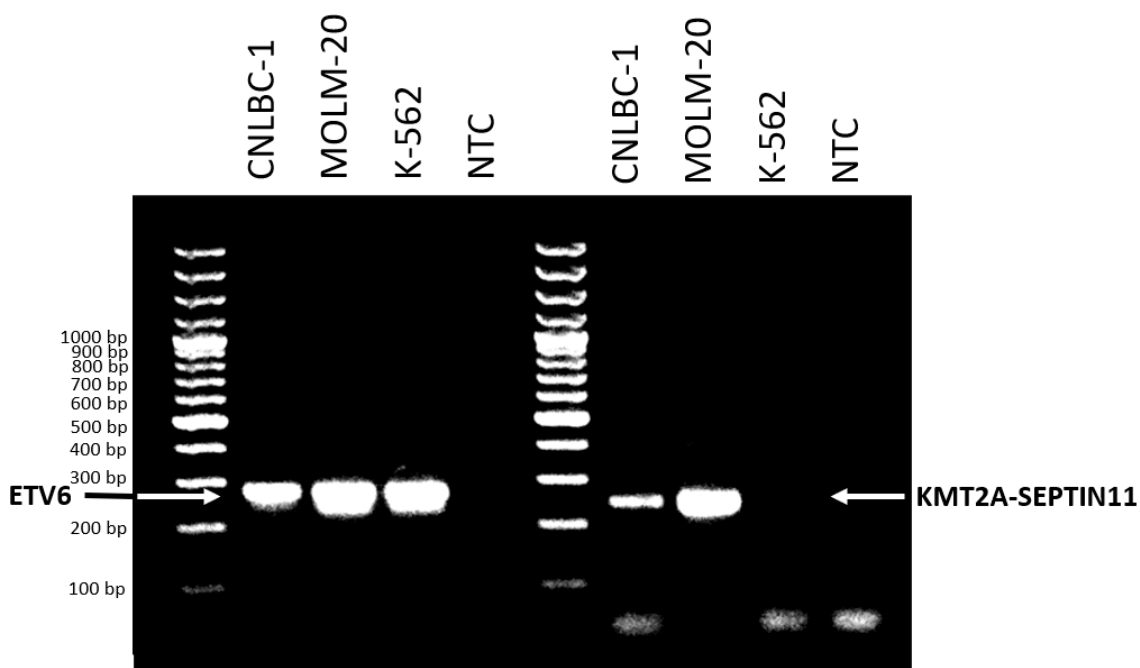

**Figure S1.** the whole blot (uncropped blots) for Figure 1C.
